# Supplementary material for: Generation of Cytotoxic T cells and Dysfunctional CD8 T Cells in Severe COVID19 Patients
Source: Preprints.org preprint supplement (doi:10.20944/preprints202208.0496.v1), 2022-08-29
Supplement: Supplementary file 2 [file supplementary]

Archive with 9 entries (9 files):
- Image 1.TIF
- Image 2.TIF
- Image 3.TIF
- Image 4.TIF
- Image 5.TIF
- Image 6.TIF
- Image 7.TIF
- SupMaterial MDPI.DOCX
- SupMaterial MDPI.pdf
