# Supplementary figures and images for: Generation of Cytotoxic T cells and Dysfunctional CD8 T Cells in Severe COVID19 Patients
Source: Preprints.org preprint supplement (doi:10.20944/preprints202208.0496.v1), 2022-08-29

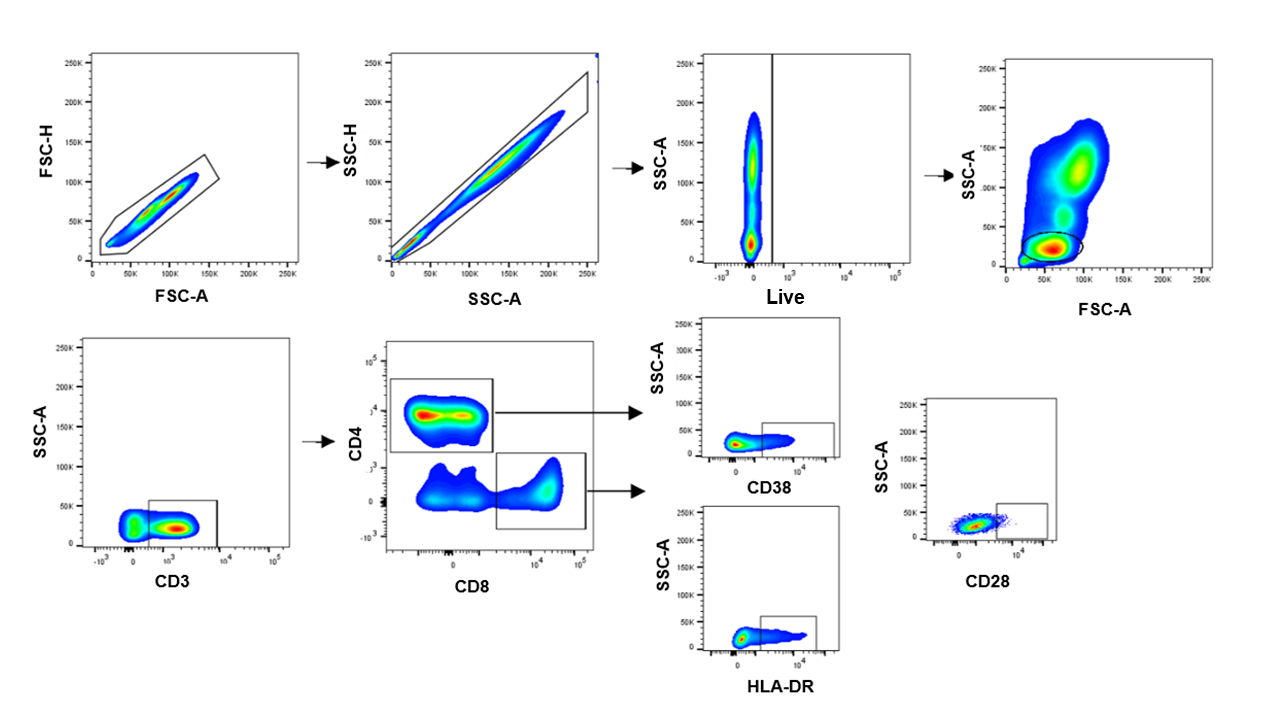

Supplement: Supplementary file 2 [file supplementary › Image 1.TIF]

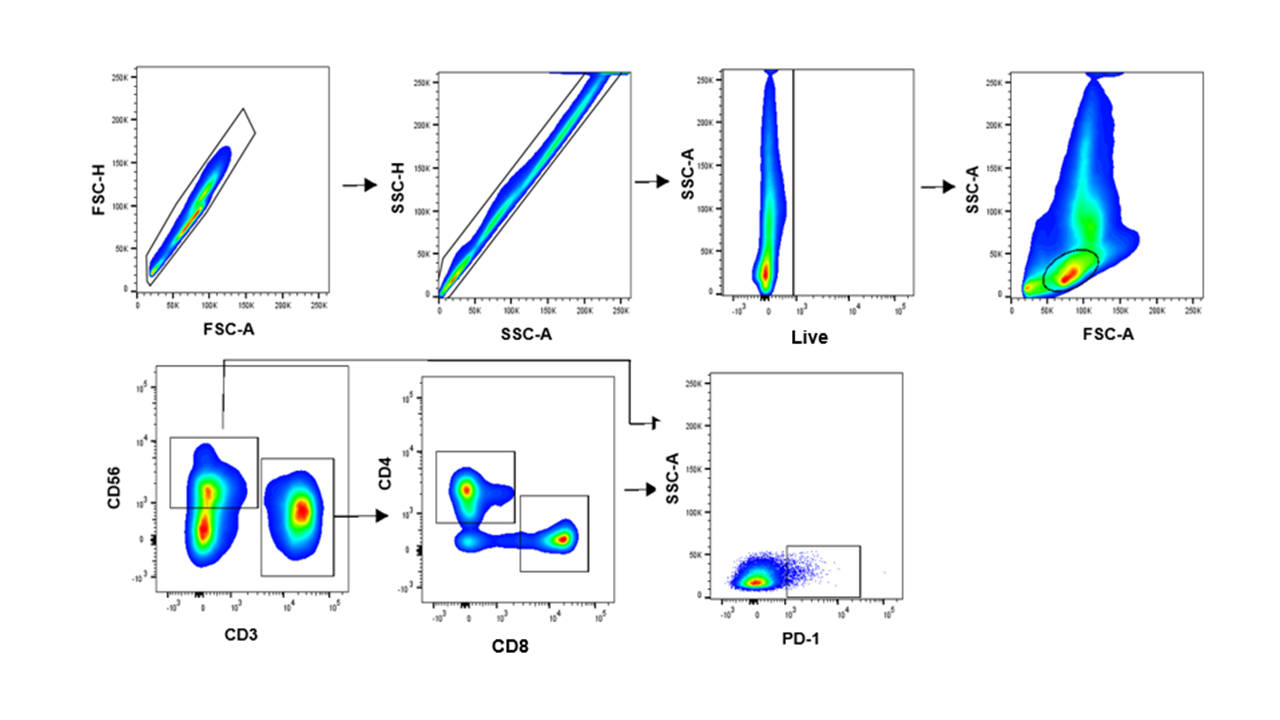

Supplement: Supplementary file 2 [file supplementary › Image 2.TIF]

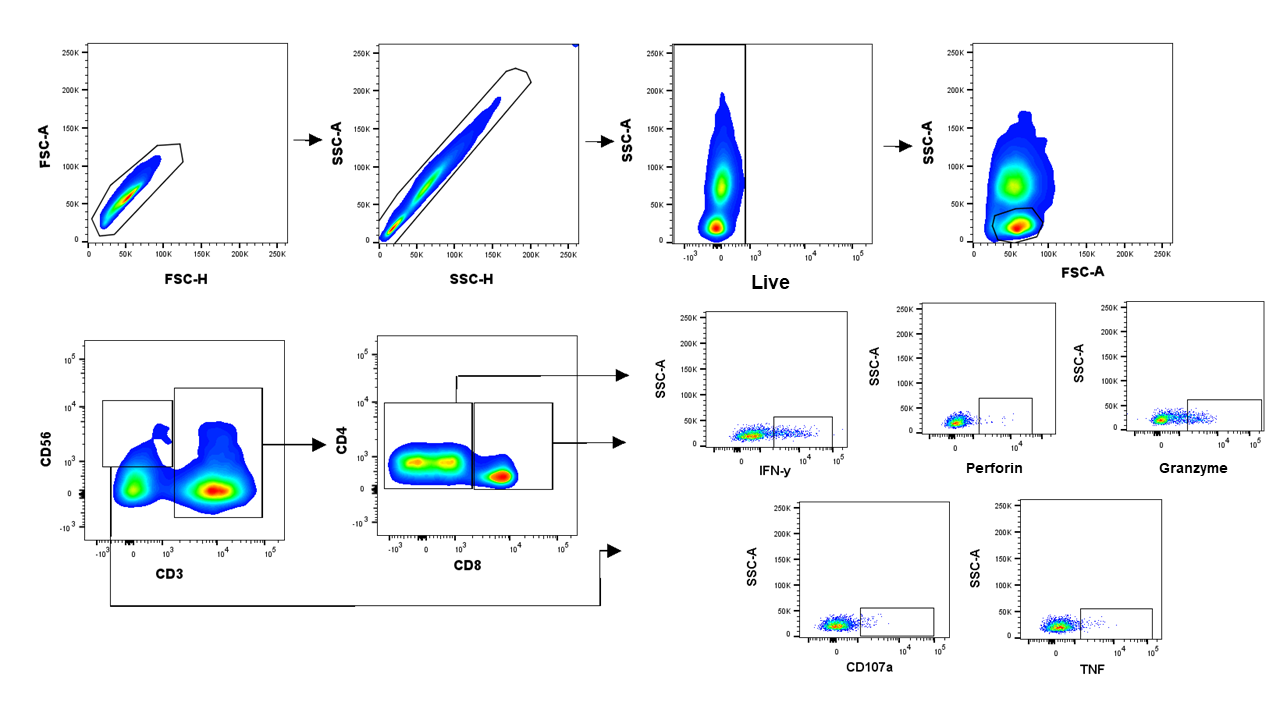

Supplement: Supplementary file 2 [file supplementary › Image 3.TIF]

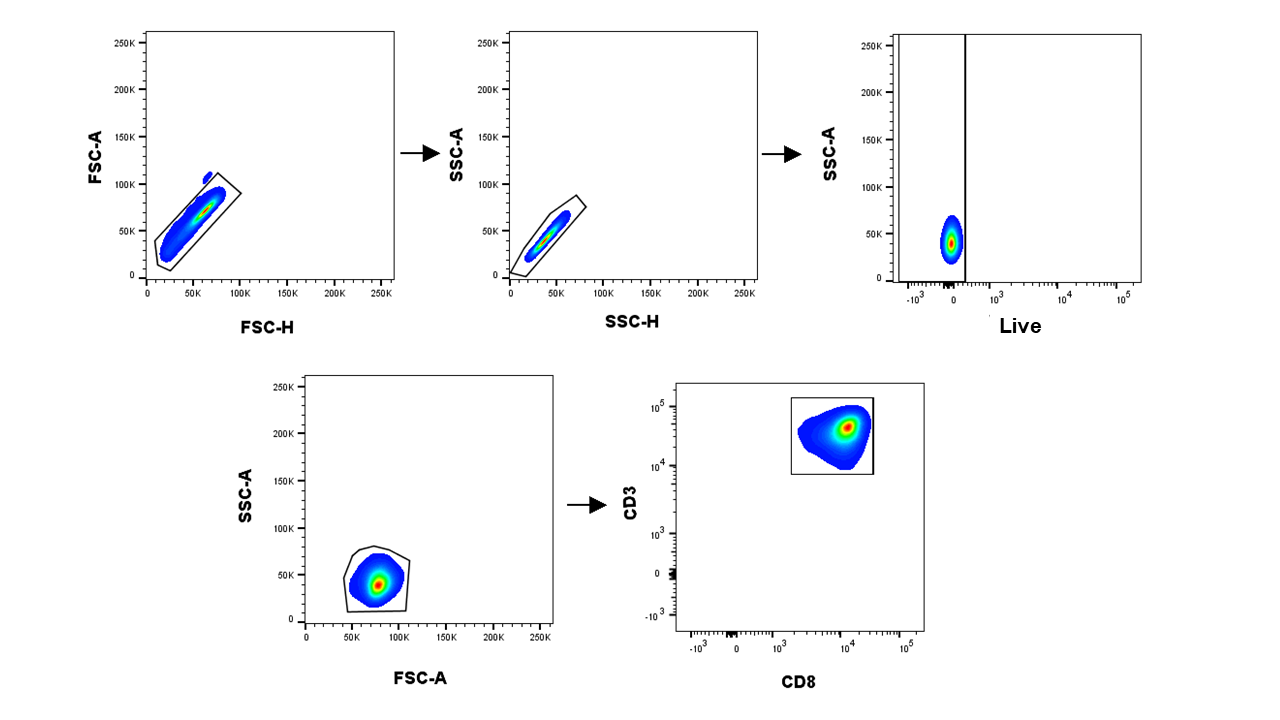

Supplement: Supplementary file 2 [file supplementary › Image 4.TIF]

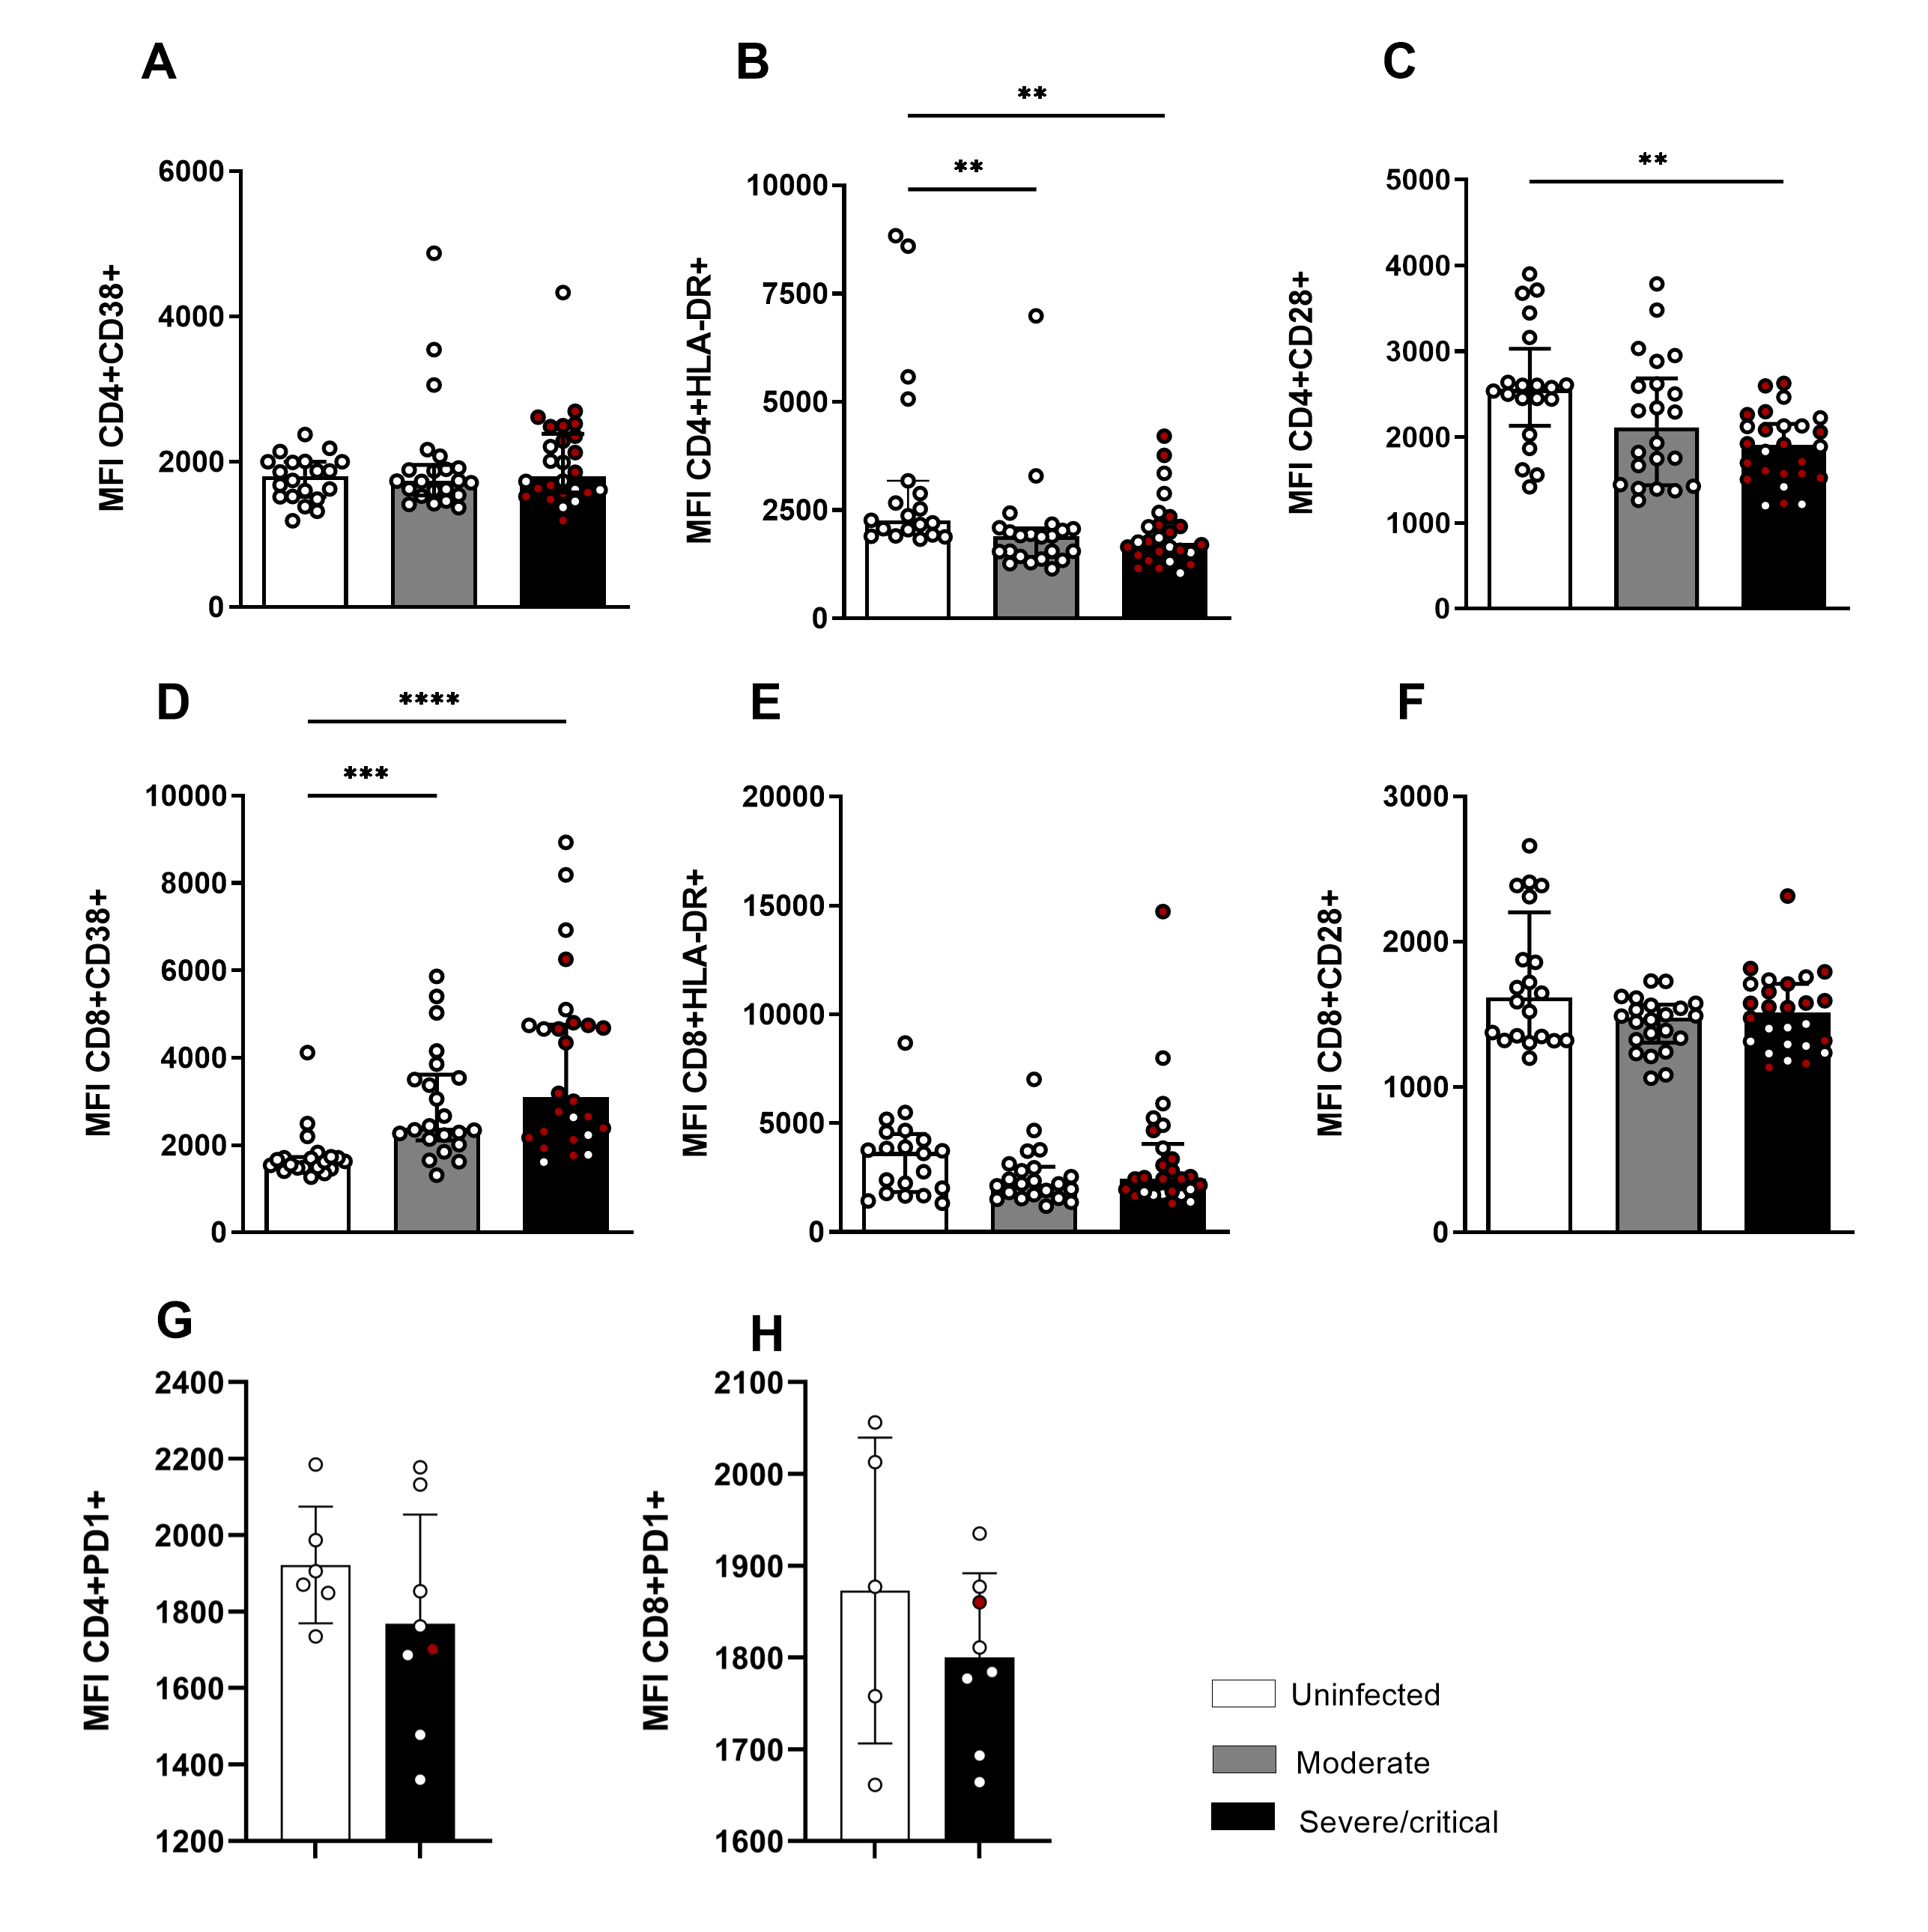

Supplement: Supplementary file 2 [file supplementary › Image 5.TIF]

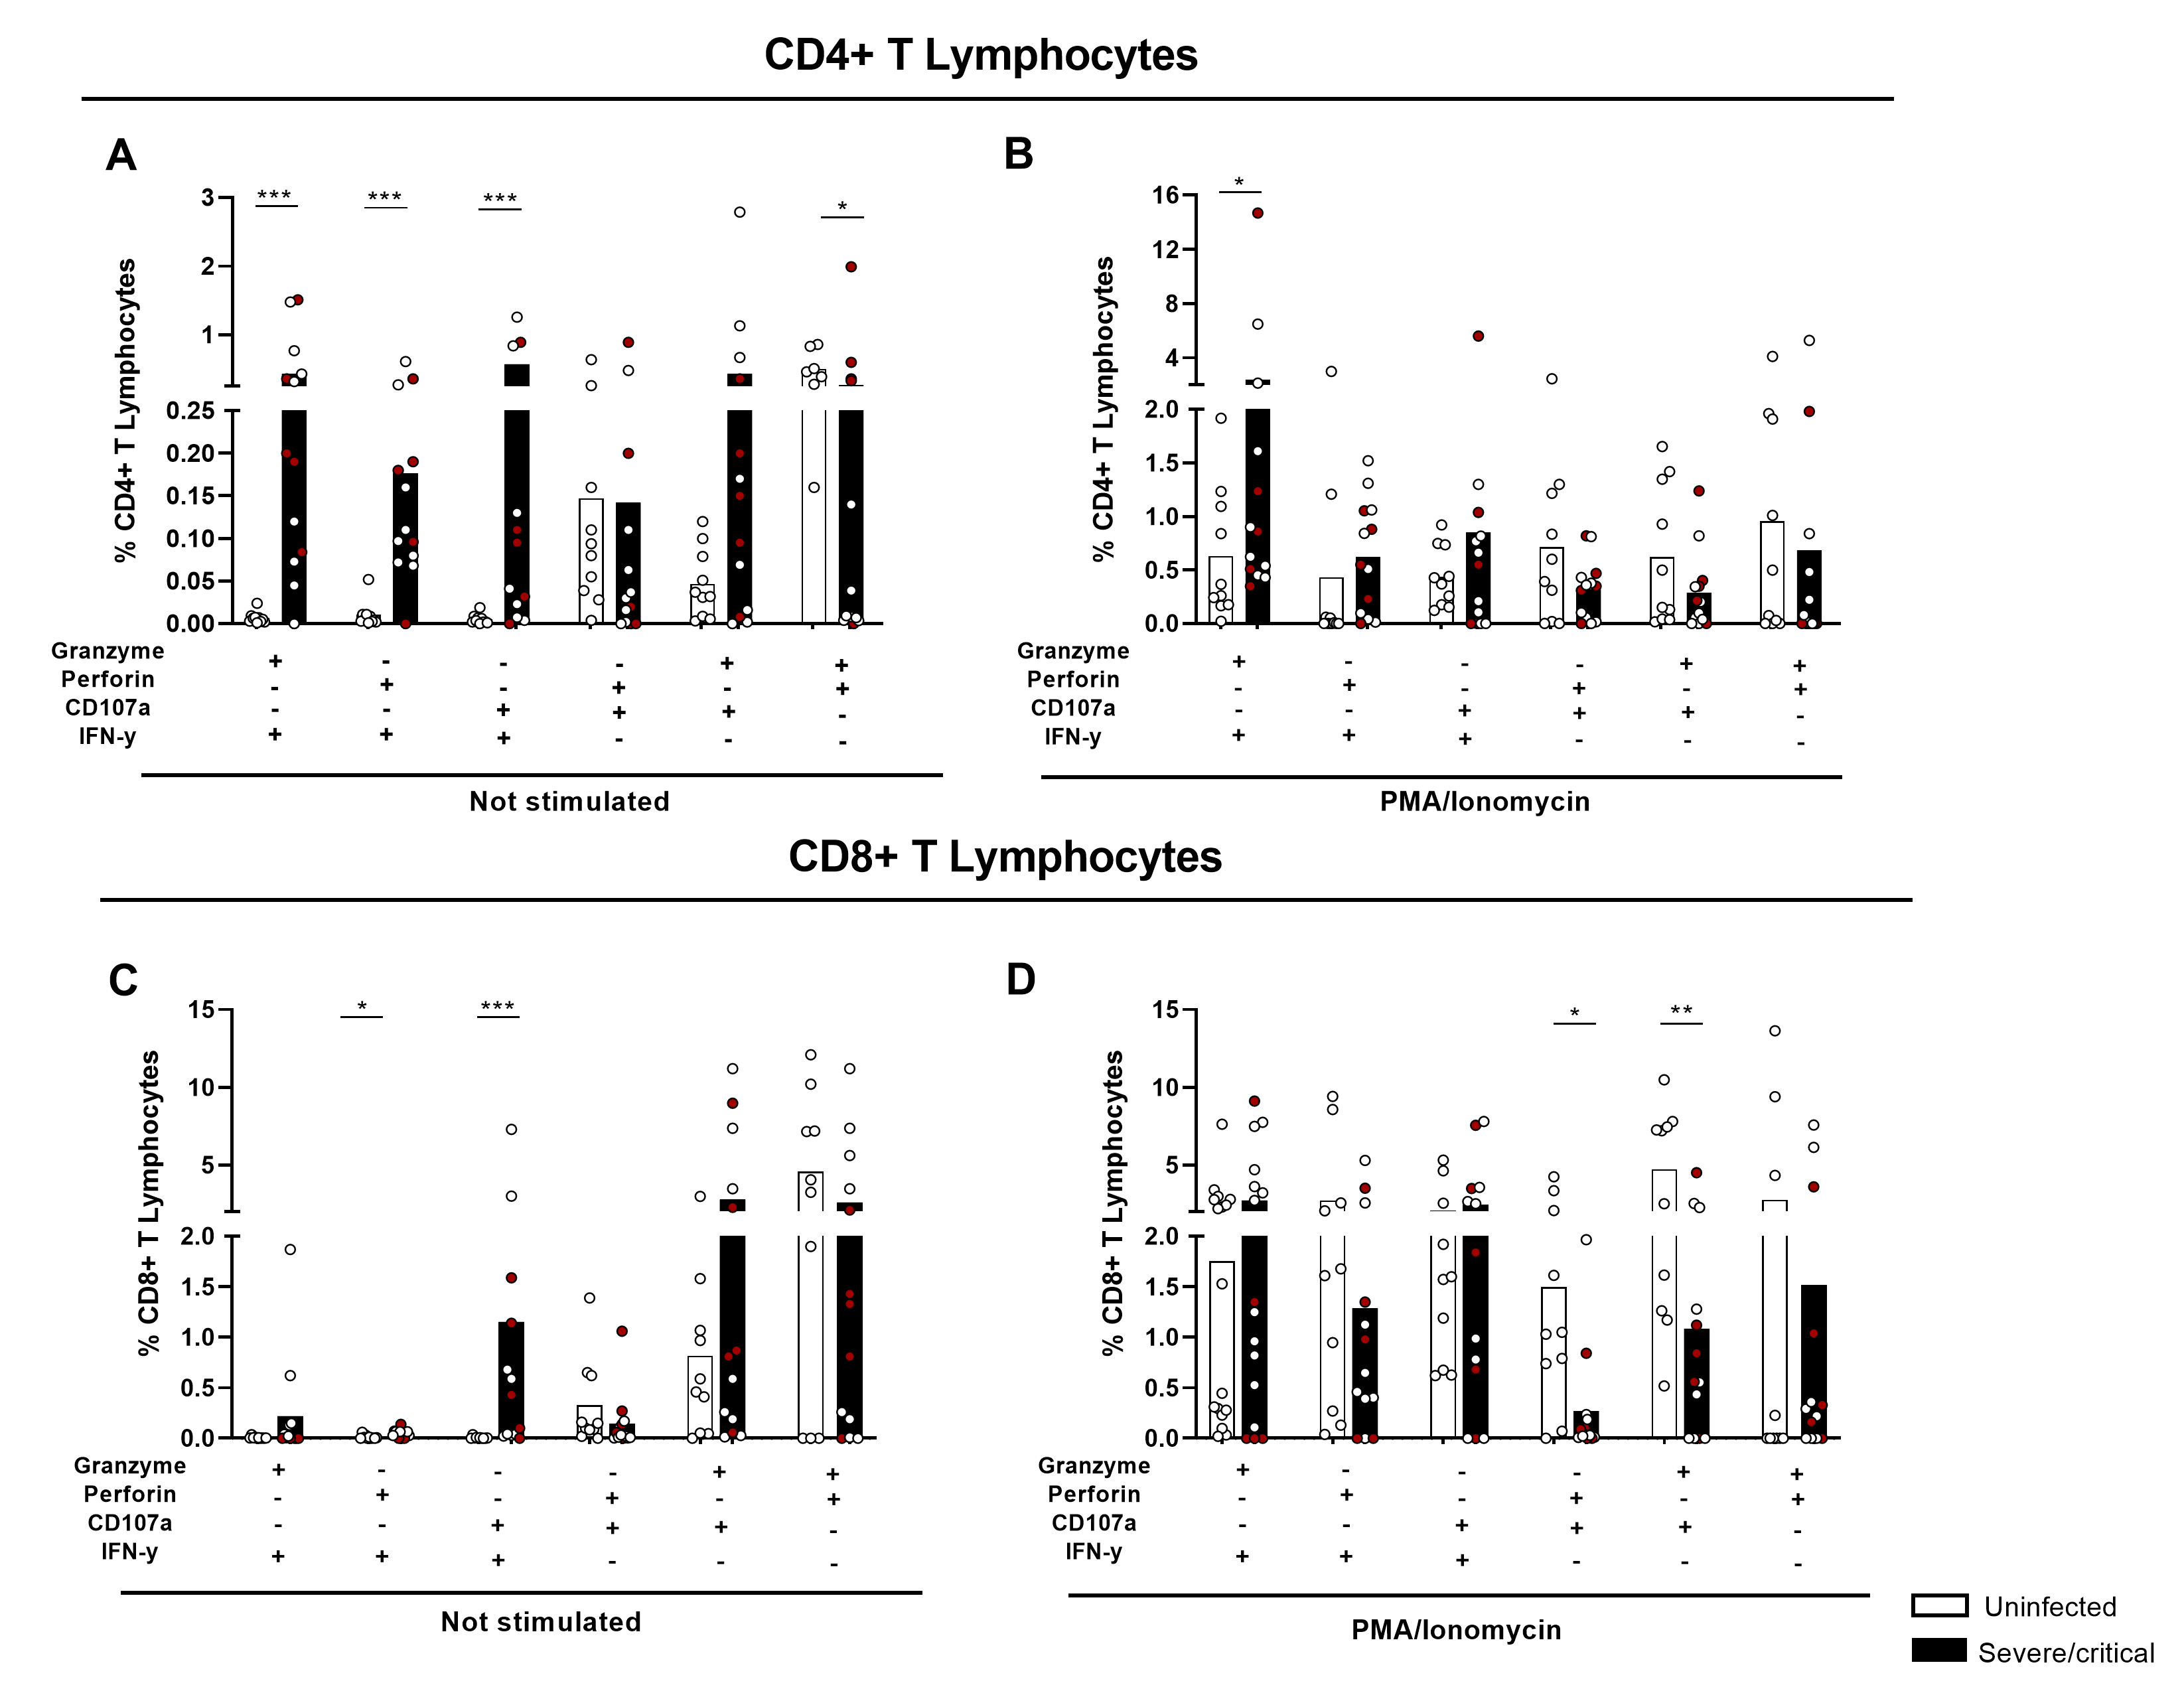

Supplement: Supplementary file 2 [file supplementary › Image 6.TIF]

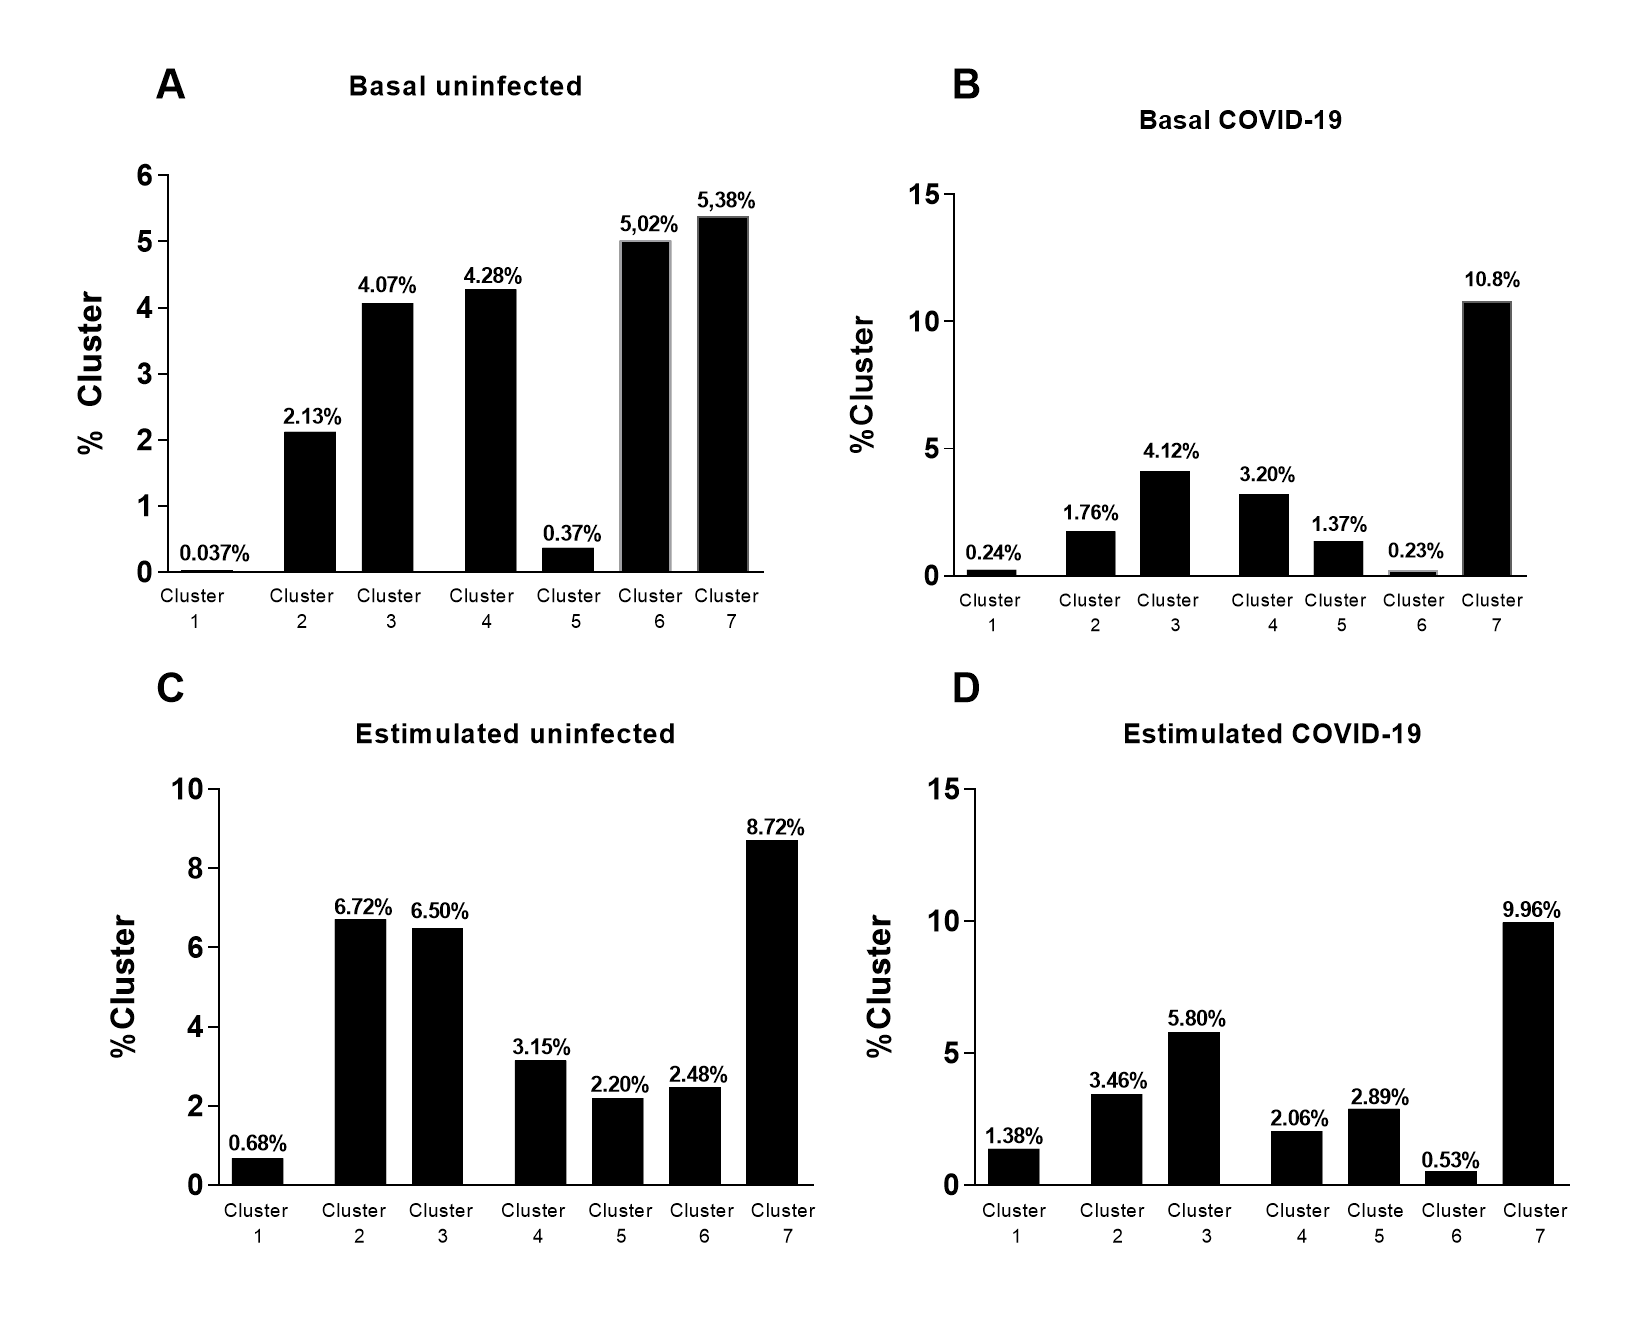

Supplement: Supplementary file 2 [file supplementary › Image 7.TIF]
